# Supplementary material for: Maternal Serum Folate During Pregnancy and Congenital Heart Disease in Offspring
Source: PubMed Central journal article supplement (PMC11581582; doi:10.1001/jamanetworkopen.2024.38747), 2024-10-10
Supplement: jamanetwopen-e2438747-s001.pdf [file jamanetwopen-e2438747-s001.pdf]

## Supplemental Online Content

Qu Y, Liu X, Lin S, et al. Maternal serum folate during pregnancy and congenital heart disease in offspring. *JAMA Netw Open*. 2024;7(10):e2438747. doi:10.1001/jamanetworkopen.2024.38747

### eMethods

**eFigure 1.** Flow Chart of the Study Participants' Selection

**eFigure 2.** Maternal Serum Levels of Folate at Early to Midpregnancy and Risk of Congenital Heart Diseases (CHD) in Offspring

**eTable 1.** Maternal Serum Folate Levels According to Folate Metabolism-Related Genetic Polymorphisms

**eTable 2.** Maternal Serum Folate Levels According to Periconceptional Folic Acid Supplementation

**eTable 3.** Association Between Maternal Serum Folate Levels and CHD Risk in Offspring, Sensitivity Analysis by Excluding 46 Participants With Missing Folate Metabolism-Related Genetic Polymorphisms

**eTable 4.** Maternal Characteristics According to offspring's Congenital Heart Disease Status, Sensitivity Analysis Using Propensity Score Matching on Maternal Age, Education, Occupation, Parity, and Folic Acid Supplementation at a Ratio of 1:4

**eTable 5.** Association between Maternal Serum Folate Levels and CHD Risk in Offspring, Sensitivity Analysis Using Propensity Score Matching on Maternal Age, Education, Occupation, Parity, and Folic Acid Supplementation at a Ratio of 1:4

**eTable 6.** Mediating Effects of Maternal Elevated Homocysteine on the Association of Low Folate and Vitamin B<sub>12</sub> Deficiency With Congenital Heart Disease Risk in Offspring

**eTable 7.** Comparison of Maternal Serum Folate Levels Between Our Study and Chen's Study

This supplemental material has been provided by the authors to give readers additional information about their work.



## **eMethods**

### **CHD diagnosis**

CHD was diagnosed and confirmed through a comprehensive multi-stage approach, which involved fetal ultrasound screening, fetal echocardiography examination, neonatal cardiac evaluations, postnatal echocardiography confirmation, and follow-up assessments of the infants. In detail, all pregnancies underwent basic ultrasound screening for fetal cardiac anomalies between 18 and 24 weeks of gestation. Suspected CHD fetuses were further evaluated through echocardiography at 22 to 26 weeks of gestation to confirm the diagnosis. Following delivery, each newborn received a clinical cardiac assessment before discharge, usually within 72 hours, according to international guidelines. Newborns with suspected CHD and those prenatally diagnosed underwent postnatal echocardiography to confirm the CHD diagnoses. Live births were followed up until one year after birth to identify any late-identifying CHD. CHD diagnoses were further corroborated through additional methods, such as autopsy, cardiac catheterization, and surgery when available. Each CHD case was reviewed by two senior pediatric cardiologists, and any disagreements were resolved by a third one. One predominant phenotype with the most severe hemodynamic pathology was assigned to each case with multiple CHD diagnoses. A total of 172 infants were diagnosed with CHD among these pregnancies.

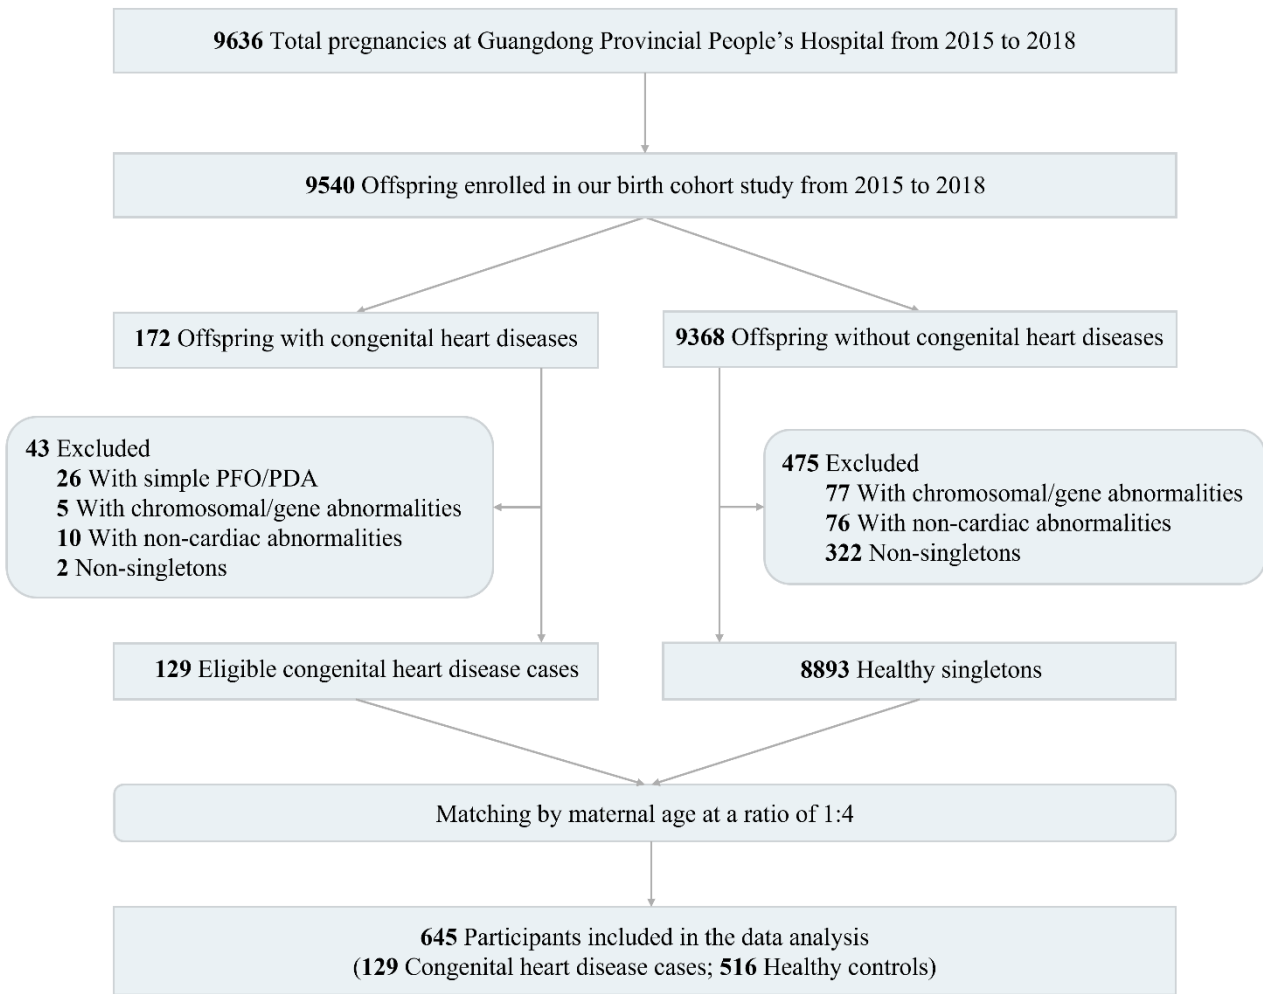

**eFigure 1.** Flow Chart of the Study Participants' Selection

Abbreviations: PDA, patent ductus arteriosus; PFO, patent foramen ovale.

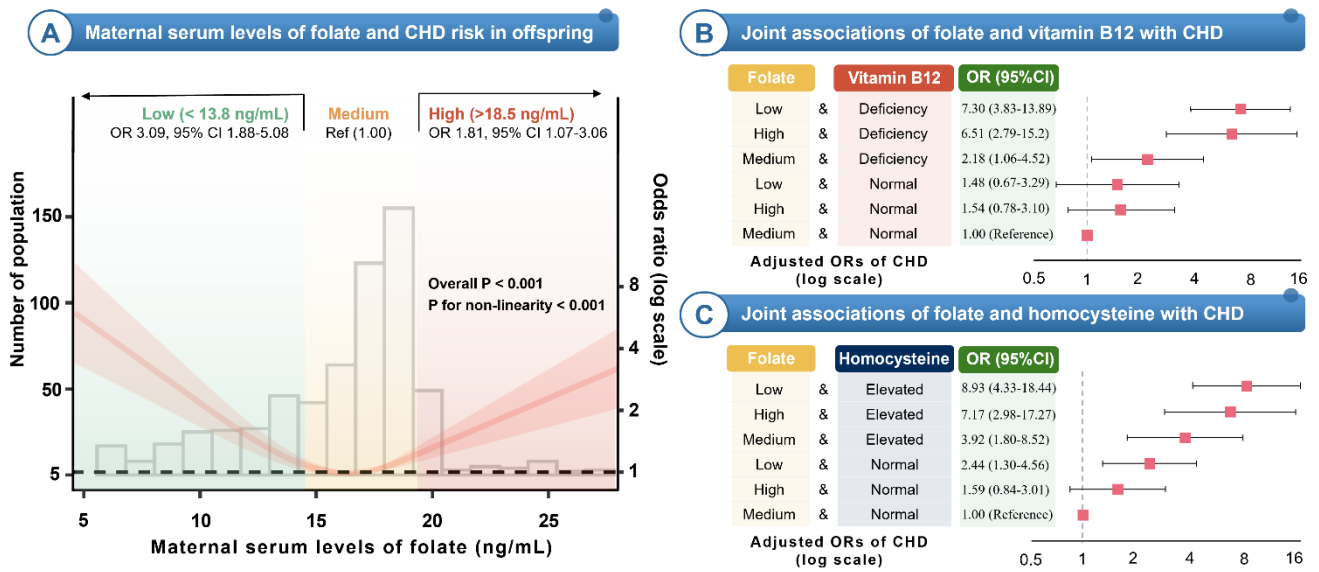

**eFigure 2.** Maternal Serum Levels of Folate at Early to Midpregnancy and Risk of Congenital Heart Diseases (CHD) in Offspring

**eTable 1.** Maternal Serum Folate Levels According to Folate Metabolism-Related Genetic Polymorphisms

| <b>Maternal folate metabolism-related genetic polymorphisms</b> |                   |                   |                  |                |
|-----------------------------------------------------------------|-------------------|-------------------|------------------|----------------|
| <b>MTHFR 677</b>                                                | <b>CC</b>         | <b>CT</b>         | <b>TT</b>        | <b>P value</b> |
| Total No.                                                       | 329               | 216               | 54               |                |
| CHD cases, No. (%)                                              | 74 (22.5)         | 35 (16.2)         | 13 (24.1)        | 0.16           |
| Maternal serum folate levels (ng/mL)                            | 17.00 (13.6-18.5) | 17.25 (14.4-18.6) | 17.1 (12.6-18.4) | 0.76           |
| Quartiles of maternal serum folate levels                       |                   |                   |                  |                |
| Low (Q1, <13.8 ng/mL)                                           | 88 (26.7)         | 45 (20.8)         | 14 (25.9)        |                |
| Medium (Q2-Q3, 13.8-18.5 ng/mL)                                 | 159 (48.3)        | 117 (54.2)        | 29 (53.7)        | 0.51           |
| High (Q4, >18.5 ng/mL)                                          | 82 (24.9)         | 54 (25.0)         | 11 (20.4)        |                |
| <b>MTHFR 1298</b>                                               | <b>AA</b>         | <b>AC</b>         | <b>CC</b>        | <b>P value</b> |
| Total No.                                                       | 353               | 216               | 30               |                |
| CHD cases, No. (%)                                              | 78 (22.1)         | 37 (17.1)         | 7 (23.3)         | 0.33           |
| Maternal serum folate levels (ng/mL)                            | 16.9 (13.6-18.5)  | 17.2 (14.1-18.6)  | 17.1 (15.7-18.5) | 0.56           |
| Quartiles of maternal serum folate levels                       |                   |                   |                  |                |
| Low (Q1, <13.8 ng/mL)                                           | 92 (26.1)         | 50 (23.1)         | 5 (16.7)         |                |
| Medium (Q2-Q3, 13.8-18.5 ng/mL)                                 | 179 (50.7)        | 108 (50.0)        | 18 (60.0)        | 0.64           |
| High (Q4, >18.5 ng/mL)                                          | 82 (23.2)         | 58 (26.9)         | 7 (23.3)         |                |
| <b>MTRR 66</b>                                                  | <b>AA</b>         | <b>AG</b>         | <b>GG</b>        | <b>P value</b> |
| Total No.                                                       | 331               | 216               | 52               |                |
| CHD cases, No. (%)                                              | 66 (19.9)         | 48 (22.2)         | 8 (15.4)         | 0.52           |
| Maternal serum folate levels (ng/mL)                            | 17.2 (14.0-18.5)  | 17.1 (13.9-18.6)  | 16.4 (12.9-18.6) | 0.52           |
| Quartiles of maternal serum folate levels                       |                   |                   |                  |                |
| Low (Q1, <13.8 ng/mL)                                           | 77 (23.3)         | 52 (24.1)         | 18 (34.6)        |                |
| Medium (Q2-Q3, 13.8-18.5 ng/mL)                                 | 174 (52.6)        | 110 (50.9)        | 21 (40.4)        | 0.44           |
| High (Q4, >18.5 ng/mL)                                          | 80 (24.2)         | 54 (25.0)         | 13 (25.0)        |                |

Abbreviation: CHD, congenital heart disease; MTHFR, 5,10-methylenetetrahydrofolate reductase; MTRR, 5-methyltetrahydrofolate-homocysteine methyltransferase reductase; Q, quartile.

**eTable 2.** Maternal Serum Folate Levels According to Periconceptual Folic Acid Supplementation

|                                           | Maternal periconceptual folic acid supplementation |                  | <i>P</i> value |
|-------------------------------------------|----------------------------------------------------|------------------|----------------|
|                                           | Yes                                                | No               |                |
| Total No.                                 | 611                                                | 34               |                |
| CHD cases, No. (%)                        | 122 (20.0)                                         | 7 (20.6)         | 0.93           |
| Maternal serum folate levels (ng/mL)      | 17.1 (14.0-18.6)                                   | 14.7 (11.4-17.8) | 0.001          |
| Quartiles of maternal serum folate levels |                                                    |                  |                |
| Low (Q1, <13.8 ng/mL)                     | 142 (23.2%)                                        | 17 (50.0%)       |                |
| Medium (Q2-Q3, 13.8-18.5 ng/mL)           | 314 (51.4%)                                        | 14 (41.2%)       | 0.01           |
| High (Q4, >18.5 ng/mL)                    | 155 (25.4%)                                        | 3 (8.8%)         |                |

Abbreviation: CHD, congenital heart disease; Q, quartile

**eTable 3.** Association Between Maternal Serum Folate Levels and CHD Risk in Offspring, Sensitivity Analysis by Excluding 46 Participants With Missing Folate Metabolism-Related Genetic Polymorphisms

| <b>Maternal serum levels of folate at early-mid pregnancy</b> |                                       |                                                |                                      |
|---------------------------------------------------------------|---------------------------------------|------------------------------------------------|--------------------------------------|
|                                                               | <b>Low<br/>(Q1, &lt;13.8 ng/mL)</b>   | <b>Medium<br/>(Q2-Q3, 13.8-18.5<br/>ng/mL)</b> | <b>High<br/>(Q4, &gt;18.5 ng/mL)</b> |
| CHD cases/Controls                                            | 48/99                                 | 42/263                                         | 32/115                               |
| ORs (95% CI)                                                  |                                       |                                                |                                      |
| Model 1                                                       | 3.21 (1.98-5.20)                      | Ref                                            | 1.83 (1.10-3.04)                     |
| Model 2                                                       | 3.05 (1.87-4.98)                      | Ref                                            | 1.74 (1.05-2.91)                     |
| Model 3                                                       | 3.20 (1.90-5.39)                      | Ref                                            | 1.84 (1.07-3.16)                     |
| Model 3 + Vit B12                                             | 2.45 (1.42-4.24)                      | Ref                                            | 2.00 (1.14-3.51)                     |
| Model 3 + Hcy                                                 | 2.12 (1.21-3.71)                      | Ref                                            | 1.69 (0.97-2.94)                     |
| Model 3 + Vit B12 + Hcy                                       | 1.77 (0.99-3.15)                      | Ref                                            | 1.80 (1.01-3.22)                     |
| <b>WHO criteria</b>                                           |                                       |                                                |                                      |
|                                                               | <b>Deficiency<br/>(&lt;5.9 ng/mL)</b> | <b>Normal<br/>(5.9-20 ng/mL)</b>               | <b>Elevated<br/>(&gt;20 ng/mL)</b>   |
| CHD cases/Controls                                            | 10/4                                  | 93/457                                         | 19/16                                |
| ORs (95% CI)                                                  |                                       |                                                |                                      |
| Model 1                                                       | 20.11 (4.32-93.56)                    | Ref                                            | 6.00 (2.94-12.21)                    |
| Model 2                                                       | 19.40 (4.00-94.04)                    | Ref                                            | 5.62 (2.72-11.62)                    |
| Model 3                                                       | 16.77 (3.38-83.11)                    | Ref                                            | 5.26 (2.49-11.10)                    |
| Model 3 + Vit B12                                             | 11.03 (2.18-55.92)                    | Ref                                            | 6.10 (2.70-13.79)                    |
| Model 3 + Hcy                                                 | 9.22 (1.75-48.53)                     | Ref                                            | 4.10 (1.88-8.95)                     |
| Model 3 + Vit B12 + Hcy                                       | 6.69 (1.27-35.24)                     | Ref                                            | 4.85 (2.08-11.30)                    |

Model 1 is unadjusted. Model 2 was adjusted for periconceptional folic acid supplementation, maternal education, occupation, parity, abortion history, pregnancy with diabetes, pregnancy with hypertension, pregnancy with cardiac diseases, infection, and in vitro fertilization and embryo transfer. Model 3 was additionally adjusted for maternal MTHFR 677, MTHFR 1298, and MTRR 66 polymorphisms.

Abbreviations: CHD, congenital heart disease; CI, confidential interval; Hcy, homocysteine; OR, odds ratio; Q, quartile; Ref, reference; Vit B12, vitamin B12.



**eTable 4.** Maternal Characteristics According to offspring's Congenital Heart Disease Status, Sensitivity Analysis Using Propensity Score Matching on Maternal Age, Education, Occupation, Parity, and Folic Acid Supplementation at a Ratio of 1:4

|                                                     | <b>CHD cases<br/>(N=129)</b> | <b>Controls<br/>(N=516)</b> | <i>P-value</i> |
|-----------------------------------------------------|------------------------------|-----------------------------|----------------|
| <b>Matching characteristics</b>                     |                              |                             |                |
| Age (years)                                         | 31.5±5.45                    | 31.6±5.25                   | 0.93           |
| Education (years)                                   |                              |                             |                |
| ≤12                                                 | 3 (2.3)                      | 9 (1.7)                     | 0.66           |
| >12                                                 | 126 (97.7)                   | 507 (98.3)                  |                |
| Unemployed                                          |                              |                             |                |
| Yes                                                 | 16 (12.4)                    | 71 (13.8)                   | 0.68           |
| No                                                  | 113 (87.6)                   | 445 (86.2)                  |                |
| Nulliparous                                         |                              |                             |                |
| Yes                                                 | 72 (55.8)                    | 287 (55.6)                  | 0.97           |
| No                                                  | 57 (44.2)                    | 229 (44.4)                  |                |
| Periconceptional folic acid supplementation         |                              |                             |                |
| Yes                                                 | 122 (94.6)                   | 482 (93.4)                  | 0.63           |
| No                                                  | 7 (5.4)                      | 34 (6.6)                    |                |
| <b>Gestational weeks at blood collection</b>        | 16.45±5.57                   | 16.85±2.55                  | 0.51           |
| <b>Serum folate (ng/mL)</b>                         | 16.0 (10.6-18.6)             | 17.3 (14.7-18.5)            | 0.06           |
| <b>Serum vitamin B12 (pg/mL)</b>                    | 280 (208-399)                | 391 (305-507)               | <0.001         |
| <b>Serum homocysteine (μmol/L)</b>                  | 6.7 (5.3-8.8)                | 5.3 (4.4-6.3)               | <0.001         |
| <b>Folate metabolism-related gene polymorphisms</b> |                              |                             |                |
| MTHFR 677                                           |                              |                             |                |
| CC                                                  | 74 (60.7)                    | 287 (59.1)                  | 0.38           |
| CT                                                  | 35 (28.7)                    | 166 (34.2)                  |                |
| TT                                                  | 13 (10.7)                    | 33 (6.8)                    |                |
| MTHFR 1298                                          |                              |                             |                |
| AA                                                  | 78 (63.9)                    | 284 (58.4)                  | 0.45           |
| AC                                                  | 37 (30.3)                    | 175 (36.0)                  |                |
| CC                                                  | 7 (5.7)                      | 27 (5.6)                    |                |
| MTRR 66                                             |                              |                             |                |
| AA                                                  | 66 (54.1)                    | 277 (57.0)                  | 0.73           |
| AG                                                  | 48 (39.3)                    | 176 (36.2)                  |                |
| GG                                                  | 8 (6.6)                      | 33 (6.8)                    |                |

### Other characteristics

|                                       |            |            |      |
|---------------------------------------|------------|------------|------|
| Elective/spontaneous abortion history |            |            |      |
| Yes                                   | 53 (41.1)  | 194 (37.6) | 0.47 |
| No                                    | 76 (58.9)  | 322 (62.4) |      |
| Prepregnant BMI (kg/m <sup>2</sup> )  | 20.7±3.0   | 21.2±3.2   | 0.18 |
| Pregnancy with diabetes               |            |            |      |
| Yes                                   | 18 (14.0)  | 96 (18.6)  | 0.22 |
| No                                    | 111 (86.0) | 420 (81.4) |      |
| Pregnancy with hypertension           |            |            |      |
| Yes                                   | 10 (7.8)   | 28 (5.4)   | 0.32 |
| No                                    | 119 (92.2) | 488 (94.6) |      |
| Pregnancy with cardiac disease        |            |            |      |
| Yes                                   | 15 (11.6)  | 45 (8.7)   | 0.32 |
| No                                    | 114 (88.4) | 471 (91.3) |      |
| Pregnancy with infection              |            |            |      |
| Yes                                   | 16 (12.4)  | 54 (10.5)  | 0.53 |
| No                                    | 113 (87.6) | 462 (89.5) |      |
| IVF-ET                                |            |            |      |
| Yes                                   | 6 (4.7)    | 28 (5.4)   | 0.72 |
| No                                    | 123 (95.3) | 488 (94.6) |      |
| Antibiotics use                       |            |            |      |
| Yes                                   | 7 (5.4)    | 39 (7.6)   | 0.40 |
| No                                    | 122 (94.6) | 477 (92.4) |      |
| Anti-miscarriage medicine uses        |            |            |      |
| Yes                                   | 11 (8.5)   | 45 (8.7)   | 0.92 |
| No                                    | 118 (91.5) | 471 (91.3) |      |

---

Continuous variables are described as mean ± SD for those with normal distribution and median (IQR) for those with nonnormal distribution. Categorical variables were presented as numbers (percent). The comparison of maternal characteristics between CHD cases and non-CHD controls was conducted using univariate conditional logistic regression.

Abbreviations: BMI, body mass index; CHD, congenital heart disease; IVF-ET, *in vitro* fertilization and embryo transfer; MTHFR, 5,10-methylenetetrahydrofolate reductase; MTRR, 5-methyltetrahydrofolate-homocysteine methyltransferase reductase.

**eTable 5.** Association between Maternal Serum Folate Levels and CHD Risk in Offspring, Sensitivity Analysis Using Propensity Score Matching on Maternal Age, Education, Occupation, Parity, and Folic Acid Supplementation at a Ratio of 1:4

| <b>Maternal serum levels of folate at early-mid pregnancy</b> |                                       |                                                |                                      |
|---------------------------------------------------------------|---------------------------------------|------------------------------------------------|--------------------------------------|
|                                                               | <b>Low<br/>(Q1, &lt;13.8 ng/mL)</b>   | <b>Medium<br/>(Q2-Q3, 13.8-18.5<br/>ng/mL)</b> | <b>High<br/>(Q4, &gt;18.5 ng/mL)</b> |
| CHD cases/Controls                                            | 51/101                                | 44/288                                         | 34/127                               |
| ORs (95% CI)                                                  |                                       |                                                |                                      |
| Model 1                                                       | 3.30 (2.07-5.26)                      | Ref                                            | 1.67 (1.03-2.74)                     |
| Model 2                                                       | 3.34 (2.08-5.36)                      | Ref                                            | 1.65 (1.01-2.71)                     |
| Model 3                                                       | 3.24 (2.00-5.24)                      | Ref                                            | 1.67 (1.02-2.74)                     |
| Model 3 + Vit B12                                             | 2.46 (1.48-4.08)                      | Ref                                            | 1.87 (1.13-3.11)                     |
| Model 3 + Hcy                                                 | 2.13 (1.27-3.58)                      | Ref                                            | 1.59 (0.96-2.64)                     |
| Model 3 + Vit B12 + Hcy                                       | 1.80 (1.06-3.07)                      | Ref                                            | 1.75 (1.04-2.93)                     |
| <b>WHO criteria</b>                                           |                                       |                                                |                                      |
|                                                               | <b>Deficiency<br/>(&lt;5.9 ng/mL)</b> | <b>Normal<br/>(5.9-20 ng/mL)</b>               | <b>Elevated<br/>(&gt;20 ng/mL)</b>   |
| CHD cases/Controls                                            | 10/5                                  | 99/505                                         | 20/6                                 |
| ORs (95% CI)                                                  |                                       |                                                |                                      |
| Model 1                                                       | 10.84 (3.28-35.82)                    | Ref                                            | 16.62 (6.16-44.79)                   |
| Model 2                                                       | 10.78 (3.21-36.25)                    | Ref                                            | 16.52 (6.12-44.58)                   |
| Model 3                                                       | 10.85 (3.13-37.60)                    | Ref                                            | 17.01 (6.22-46.53)                   |
| Model 3 + Vit B12                                             | 6.76 (1.91-23.95)                     | Ref                                            | 15.69 (5.58-44.11)                   |
| Model 3 + Hcy                                                 | 7.50 (2.00-28.13)                     | Ref                                            | 17.39 (6.15-49.21)                   |
| Model 3 + Vit B12 + Hcy                                       | 5.50 (1.45-20.86)                     | Ref                                            | 16.04 (5.59-46.02)                   |

Model 1 is unadjusted. Model 2 was adjusted for abortion history, pregnancy with diabetes, pregnancy with hypertension, pregnancy with cardiac diseases, infection, and in vitro fertilization and embryo transfer. Model 3 was additionally adjusted for maternal MTHFR 677, MTHFR 1298, and MTRR 66 polymorphisms.

Abbreviations: CHD, congenital heart disease; CI, confidential interval; Hcy, homocysteine; OR, odds ratio; Q, quartile; Ref, reference; Vit B12, vitamin B12.

**eTable 6.** Mediating Effects of Maternal Elevated Homocysteine on the Association of Low Folate and Vitamin B<sub>12</sub> Deficiency With Congenital Heart Disease Risk in Offspring

|                                    | Indirect effect  | Direct effect    | Total effect     | Proportion mediated (%) | P value |
|------------------------------------|------------------|------------------|------------------|-------------------------|---------|
| Low folate                         | 0.05 (0.03-0.08) | 0.11 (0.03-0.20) | 0.16 (0.08-0.25) | 32.9 (16.4-65.0)        | <0.001  |
| Vitamin B <sub>12</sub> deficiency | 0.04 (0.02-0.06) | 0.17 (0.10-0.25) | 0.21 (0.14-0.29) | 18.4 (10.2-31.0)        | <0.001  |

The covariates adjusted for in the mediation analyses included maternal MTHFR 677, MTHFR 1298, MTRR 66 polymorphisms, periconceptional folic acid supplementation, maternal education, occupation, parity, abortion history, pregnancy with diabetes, pregnancy with hypertension, pregnancy with cardiac diseases, infection, and *in vitro* fertilization and embryo transfer.

**eTable 7.** Comparison of Maternal Serum Folate Levels Between Our Study and Chen’s Study

| Maternal serum folate levels, Median (Inter-Quartile Range) | Our study        |                  | Chen’s study |                  |
|-------------------------------------------------------------|------------------|------------------|--------------|------------------|
|                                                             | CHD cases        | Non-CHD controls | CHD cases    | Non-CHD controls |
| Unit: ng/mL                                                 | 16.0 (10.6-18.6) | 17.2 (14.4-18.5) |              |                  |
| Unit: nmol/L <sup>a</sup>                                   | 36.3 (24.1-42.2) | 39.0 (32.7-42.0) | 31 (21-38)   | 32 (21-39)       |

<sup>a</sup> To convert the folate values from ng/mL, multiply 2.265 (Chen et al., 2022).

Abbreviations: CHD, congenital heart disease.
