# Supplementary material for: Maternal Serum Folate During Pregnancy and Congenital Heart Disease in Offspring
Source: PubMed Central journal article supplement (PMC11581582; doi:10.1001/jamanetworkopen.2024.38747), 2024-10-10
Supplement: jamanetwopen-e2438747-s002.pdf [file jamanetwopen-e2438747-s002.pdf]

## Data Sharing Statement

Qu. Maternal Serum Folate During Pregnancy and Congenital Heart Disease in Offspring.  
*JAMA Netw Open*. Published October 10, 2024. doi:10.1001/jamanetworkopen.2024.38747

### Data

**Data available:** Yes

**Data types:** Deidentified participant data

**How to access data:** [chenjimei@gdph.org.cn](mailto:chenjimei@gdph.org.cn)

**When available:** With publication

### Supporting Documents

**Document types:** None

### Additional Information

**Who can access the data:** researchers whose proposed use of the data has been approved

**Types of analyses:** for a specified purpose

**Mechanisms of data availability:** after approval of a proposal and with a signed data access agreement
